# Supplementary material for: Experimental and Modeling Studies of Torrefaction of Spent Coffee Grounds and Coffee Husk: Effects on Surface Chemistry and Carbon Dioxide Capture Performance
Source: PubMed Central journal article supplement — ACS Omega. 2021 Dec 27;7(1):638–53. doi: 10.1021/acsomega.1c05270 (PMC8756566; doi:10.1021/acsomega.1c05270), 2021-12-27
Supplement: ao1c05270_si_001.pdf [file ao1c05270_si_001.pdf]

**Experimental and modeling studies of torrefaction of spent coffee grounds and coffee husk:  
Effects on surface chemistry and carbon dioxide capture performance**

Alivia Mukherjee, Jude A. Okolie, Catherine Niu, Ajay K. Dalai\*

Department of Chemical and Biological Engineering, University of Saskatchewan  
Saskatoon, Saskatchewan, Canada

**\* Corresponding author:**

Dr. Ajay K. Dalai

Distinguished Professor and Canada Research Chair

Department of Chemical and Biological Engineering

University of Saskatchewan

57 Campus Drive, Saskatoon, Saskatchewan, S7N 5A9, Canada

Email: [ajay.dalai@usask.ca](mailto:ajay.dalai@usask.ca)

Tel: +1 (306) 966-4771; Fax: +1 (306) 966-4777

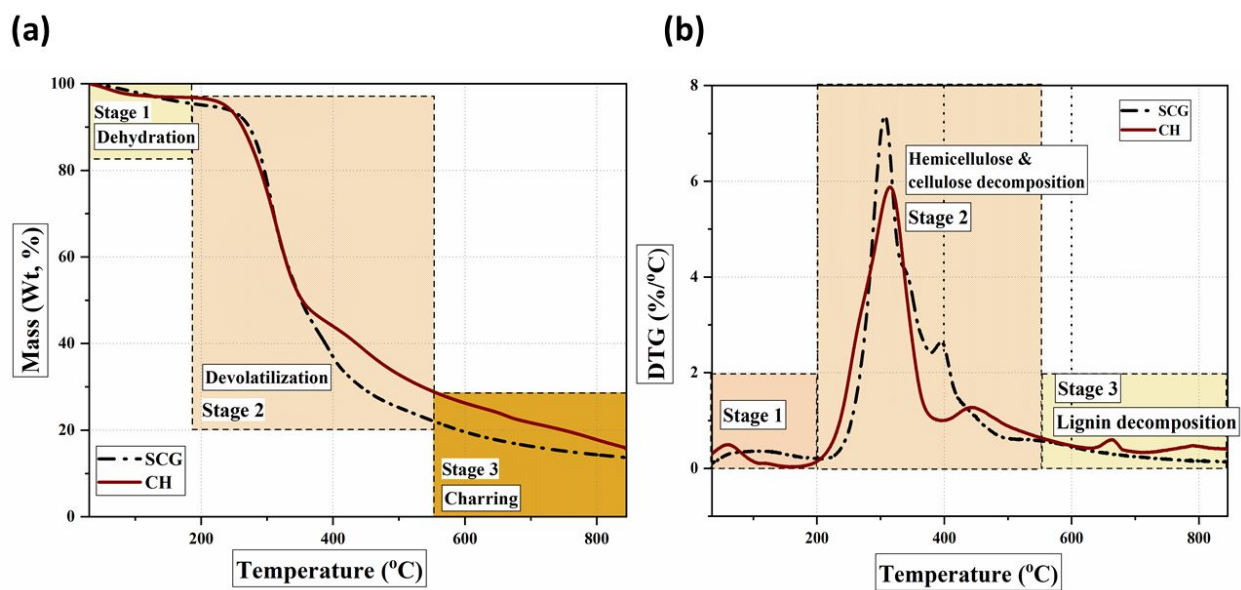

**Figure S1.** TGA-DTG analysis of (a) SCG and (b) CH (before torrefaction)

**Table S1.** Deconvoluted C1s spectra of SCG and CH derived torrefied biomass samples

| Sample       | Peak I (C1)          | Peak II (C2)   | Peak III (C4)  | Peak IV (C4)         |
|--------------|----------------------|----------------|----------------|----------------------|
|              | B.E (284.1-284.7 eV) | B.E (285.5 eV) | B.E (286.1 eV) | B.E (288.0-288.8 eV) |
| SCG-200-0.5h | 25.2                 | 28.7           | 40.4           | 8.7                  |
| SCG-300-1h   | 34.3                 | 63.5           | 11.3           | 3.5                  |
| CH-200-0.5h  | 24.4                 | 39.1           | 28.1           | 6.9                  |
| CH-300-1h    | 31.0                 | 49.1           | 19.3           | 7.2                  |

**Table S2. Deconvoluted O1s spectra of SCG and CH derived torrefied biomass samples**

| <b>Sample</b> | <b>Peak I (O1)</b>          | <b>Peak II (O2)</b>          | <b>Peak III (O3)</b>  |
|---------------|-----------------------------|------------------------------|-----------------------|
|               | <b>B.E (531.2-531.5 eV)</b> | <b>B.E (532.04-532.3 eV)</b> | <b>B.E (533.3 eV)</b> |
| SCG-200-0.5h  | 67.30                       | 22.8                         | 9.9                   |
| SCG-300-1h    | 47.03                       | 44.7                         | 8.3                   |
| CH-200-0.5h   | 60.4                        | 29.3                         | 1.3                   |
| CH-300-1h     | 39.2                        | 59.4                         | 2.7                   |
